1 **Precise regulation of the relative rates of surface area and volume**  
2 **synthesis in dynamic environments**

3

4 Handuo Shi<sup>1</sup>, Yan Hu<sup>1</sup>, Kerwyn Casey Huang<sup>1,2,3,\*</sup>

5

6 <sup>1</sup>Department of Bioengineering, Stanford University, Stanford, CA 94305, USA

7 <sup>2</sup>Department of Microbiology and Immunology, Stanford University School of

8 Medicine, Stanford, CA 94305, USA

9 <sup>3</sup>Chan Zuckerberg Biohub, San Francisco, CA 94158

10

11 \*To whom correspondence should be addressed: [kchuang@stanford.edu](mailto:kchuang@stanford.edu)

12

13 *Keywords: Escherichia coli, Bacillus subtilis, Caulobacter crescentus, Schizosaccharomyces*

14 *pombe, cell-size control, surface area to volume ratio, cell morphology, cell elongation,*

15 *cell division*

## 16 **Abstract**

17 Bacterial cells constantly face complex environmental changes in their natural habitats.

18 While steady-state cell size correlates with nutrient-determined growth rate, it remains  
19 unclear how cells regulate their morphology during rapid environmental changes.

20 Here, we systematically quantified cellular dimensions throughout passage cycles of  
21 stationary-phase cells diluted into fresh medium and grown back to saturation, and

22 found that cells exhibit characteristic dynamics in surface area to volume ratio (SA/V).

23 SA/V dynamics were conserved across many genetic/chemical perturbations, as well as

24 across species and growth temperatures. We developed a model with a single fitting

25 parameter, the time delay between surface and volume synthesis, that quantitatively

26 explained our SA/V observations, and showed that the time delay was indeed due to

27 differential expression of volume and surface-related genes. The first division after

28 dilution occurred at a tightly controlled SA/V, a previously unrecognized size-control

29 mechanism highlighting the relevance of SA/V. Finally, our time-delay model

30 successfully predicted the quantitative changes in SA/V dynamics due to altered surface

31 area synthesis rates or time delays from translation inhibition. Our minimal model thus

32 provides insight into how cells regulate their morphologies through differential

33 regulation of surface area and volume synthesis and potentiates deep understanding of

34 the connections between growth rate and cell shape in complex environments.

35

## 36 **Introduction**

37 In their natural habitats, bacterial cells constantly face dynamic environmental  
38 conditions. To survive, cells alter their physiology to cope with stresses such as nutrient  
39 depletion, chemical inhibition, and temperature shifts. During stressful conditions, cells  
40 alter their gene expression profiles, often slowing down growth and proliferation and  
41 instead allocating limited resources to genes critical for survival<sup>1</sup>. While certain genetic  
42 perturbations do not have observable effects in fast-growing cells, they cause death in  
43 stressed conditions<sup>2</sup> or impair survivability when cells resume growth after the  
44 environment becomes favorable again<sup>3,4</sup>, highlighting the unique physiological  
45 challenges posed by dynamic environments.

46  
47 Cell shape is intrinsically linked to physiology. During steady-state growth, fast-  
48 growing cells in nutrient-rich media adopt larger volumes compared to isogenic cells in  
49 minimal media<sup>5</sup>, and systematic tuning of growth rate via medium composition dictates  
50 steady-state cell size<sup>6</sup>. Gene expression is also modulated by steady-state growth rates:  
51 faster-growing cells tend to have a higher fraction of their proteome devoted to  
52 ribosomes, addressing the need for rapid protein synthesis<sup>7,8</sup>. In a batch culture, cell  
53 shape can undergo transitions in both cell width and length within several minutes<sup>9,10</sup>,  
54 in part as cells adapt their transcriptional program to the new medium and also because  
55 the growth of cells can alter the medium composition through nutrient depletion and

56 waste production. Previously, a top-down flux-balance model accurately depicted the  
57 kinetics of gene expression and growth in *Escherichia coli* cells under nutrient shifts<sup>11</sup>,  
58 but it remains unclear how these environmental and gene expression changes are  
59 transduced into cell-shape changes, and whether cell shape is actively optimized in a  
60 dynamic environment or is simply a passive outcome of cellular physiology.

61

62 In most bacteria, cell shape and size are dictated by the cell wall, a rigid network of  
63 peptidoglycan<sup>12,13</sup>. To grow and divide, cells synthesize new peptidoglycan precursors  
64 in the cytoplasm, which are then transported to the periplasm and inserted to the  
65 expanding cell wall<sup>13</sup>. In rod-shaped bacteria such as *Escherichia coli*, cell elongation and  
66 division are regulated by distinct machineries. The actin homolog MreB dictates the  
67 insertion pattern of new peptidoglycan material along the cylindrical cell body<sup>14</sup>, which  
68 elongates the cell and maintains steady-state cell width<sup>15</sup>. Cell division is regulated by  
69 FtsZ, a tubulin homolog that localizes to the mid-cell and forms a ring-like structure  
70 prior to division, which then constricts and guides septum formation<sup>13</sup>. Chemical or  
71 genetic perturbations to the elongation or division machinery alter cell-shape  
72 homeostasis through modified patterns of cell wall synthesis<sup>9,10,15-18</sup>. The extent to which  
73 such perturbations disrupt the ability of bacterial cells to adjust to new environments  
74 could provide insight into the cellular processes key to shape adaptation.

75

76 While cell width and length are thought to be regulated by distinct molecular  
77 mechanisms, previous studies have also indicated that they are somewhat inter-  
78 connected. In a non-essential gene knockout library, the mutants exhibited variation in  
79 both mean cell width and length, with a positive correlation between width and  
80 length<sup>19</sup>. Similarly, single point mutations in the MreB protein can alter both width and  
81 length<sup>20,21</sup>, yet a large library of mutants were found to all occupy a specific region of the  
82 space of cell geometries during growth in LB in which both wider and thinner mutants  
83 had longer mean lengths compared to wildtype<sup>10</sup>. Therefore, cell width and length seem  
84 to be regulated by an upstream process which unifies the two aspects of cell shape. In a  
85 previous study, it was shown that the regulation of surface area to volume ratio (SA/V)  
86 is such a process upstream of cell width and length determination: switching cells at  
87 steady-state to a condition in which only cell wall (i.e. surface area) synthesis is partially  
88 inhibited increased both cell width and length, which lowers the SA/V<sup>22</sup>. Similarly,  
89 SA/V changes during the different stages of growth, with log-phase cells having lower  
90 SA/V compared to those in stationary phase<sup>22</sup>; those measurements were performed in  
91 highly controlled microfluidic chambers, and cells took tens of minutes to several hours  
92 to fully adapt to the new steady-state morphology after the almost instantaneous  
93 medium switch. The more continuous changes that cells undergo in a dynamic  
94 environment such as batch culture have yet to be fully understood, particularly from  
95 the perspective of cellular dimensions.

96

97 In this study, based on precise and frequent experimental measurements of cellular  
98 dimensions and growth rates of a batch culture constantly experiencing nutrient  
99 compositional changes and waste accumulations, we develop a model that  
100 quantitatively predicts SA/V dynamics. Our model predicts a time delay between  
101 surface area and volume synthesis adaptation, and that cells outgrowing from  
102 stationary phase will always experience a period of active width increase due to optimal  
103 resource allocation to volumetric growth. This model focuses on global resource  
104 constraints rather than specific molecular machineries, and therefore is broadly  
105 applicable to other microbial batch cultures. Indeed, we found that the observed SA/V  
106 dynamics are qualitatively universal across microbial species and growth conditions.  
107 With only a single free parameter, our time-delay model predicts the SA/V changes due  
108 to perturbations in cell-wall synthesis or protein translation. Our work highlights the  
109 ability of bacterial cells to rapidly respond to changing environments by modifying  
110 their physical growth.

## 111 **Results**

112

### 113 **A time-delay model explains the relative dynamics of surface area and volume** 114 **synthesis in batch cultures**

115 In previous studies, we showed that as *Escherichia coli* cells transition from stationary  
116 phase to log phase and back to stationary phase in a batch culture, cellular dimensions  
117 vary along with the instantaneous growth rate<sup>9,10</sup>. After a 1:200 back-dilution of an  
118 overnight culture grown in LB into fresh LB, cells resumed growth and reached their  
119 maximum growth rate after ~1.5 h, after which growth rate gradually slowed down to  
120 approximately zero by ~4-5 h (Figure 1A). To validate our previous measurements, we  
121 extracted a small sample of cells every 15 min and quickly spotted them onto agarose  
122 pads for single-cell imaging and quantification (Methods). Mean cell length increased  
123 only slightly in the first 0.5 h. The peak in bulk growth rate at 1.5 h corresponded with  
124 the peak in mean cell length across the population (Figure 1B), which increased by ~3-  
125 fold relative to stationary phase cells. The mean cell width increased linearly  
126 immediately after dilution, and reached its maximum after ~1 h, increasing by ~25%  
127 relative to stationary phase cells (Figure 1B). Since both length and width initially  
128 increase, the surface area-to-volume ratio (SA/V) decreased over this time; SA/V  
129 reached its minimum at approximately the same time as the peak in growth rate and  
130 mean length (1.5 h; Figure 1C). After 1.5 h, the dynamics of length, width, and SA/V

131 were more gradual, with all quantities reaching plateaus by 5 h. We term these  
132 measurements of cell dimensions throughout a passage cycle as a “shape growth  
133 curve,” by analogy to absorbance measurements. Using such measurements, we can  
134 accurately capture single-cell shape dynamics in a liquid batch culture over extended  
135 time periods.

136

137 To confirm that the observed changes in cellular dimensions and SA/V were not due to  
138 artifacts of sampling, we performed time-lapse imaging by diluting and spotting  
139 stationary phase cells onto agarose pads containing fresh medium, and tracked the  
140 same cells for 1.5 h as they resumed growth on pads. The growth rates of these cells  
141 mimicked a population grown in liquid culture, and their shape dynamics recapitulated  
142 the shape growth curves (Figure 1D). In particular, each single cell immediately  
143 increased in width as soon as it was placed on the agarose pad with fresh medium,  
144 while length did not increase noticeably until 20-30 min later (Figure 1D). Therefore,  
145 our shape growth curves indeed reflect the morphological changes for each single cell  
146 in the batch culture.

147

148 Previous work showed that if surface area synthesis, like volume synthesis, is  
149 dependent on cell volume (rather than surface area), SA/V will equilibrate at a steady-  
150 state value corresponding to the ratio of surface and volume synthesis rates<sup>22</sup> (Figure



151 1E). Our measurements for cells transitioning out of and into stationary phase are  
152 clearly not at steady state as growth rate is constantly changing, and indeed mean SA/V  
153 varied by ~25%. If we extend the exponential growth laws<sup>22</sup> for volume  $V$ ,  $\frac{dV}{dt} = \alpha V(t)$ ,  
154 and surface area  $A$ ,  $\frac{dA}{dt} = \beta V(t)$ , to now cover non-exponential growth through time-  
155 dependent functions  $\alpha(t)$  and  $\beta(t)$ , we can derive (Figure 1E) an equation for the  
156 dynamics of  $A/V$ :

$$157 \quad \frac{d\left(\frac{A}{V}\right)}{dt} = \frac{1}{V} \frac{dA}{dt} - \frac{A}{V^2} \frac{dV}{dt} = \beta(t) - \alpha(t) \frac{A}{V}. \quad (3)$$

158 At steady-state,  $\frac{d\left(\frac{A}{V}\right)}{dt} = 0$ , and therefore  $\frac{A}{V} = \frac{\beta}{\alpha}$ . Previous studies have measured these  
159 steady-state SA/V values across media that support different growth rates  $\alpha$ , showing  
160 that steady-state SA/V was approximately linear (with negative slope) as a function of  
161  $\alpha^6$ . Hence, we approximated  $\beta$  as a hyperbolic function of  $\alpha$  based on our steady-state  
162 SA/V measurements (Methods), providing an empirical relationship  $\beta(t) = f(\alpha(t))$ .  
163 With our measured value of initial SA/V at  $t=0$ , the dynamics of  $\alpha$  (calculated from  
164 optical density readouts), and the function  $f$ , we obtained a prediction for the SA/V  
165 dynamics during a shape growth curve (Figure S1A), and found that the model poorly  
166 predicted our experimental measurements. Specifically, the model predicted a slower  
167 initial decrease in SA/V, and the minimum value was higher and occurred at a later  
168 time than our experimental measurements. The final SA/V value never recovered to the  
169 initial value, even though the growth rate  $\alpha$  was 0 at the beginning and end. Thus, the

170 model based on a quasi-steady state assumption does not capture some key factor(s)  
171 contributing to the SA/V changes during batch culturing.

172

173 Studies focused on the *E. coli* proteome have shown that conditions that support higher  
174 growth rate require a reallocation of protein synthesis toward ribosomes<sup>7,8</sup>. We  
175 hypothesized that the transition from stationary phase to log growth would require a  
176 similar shift in proteome composition more heavily weighted toward cytoplasmic  
177 components than surface area components (Figure 1F), which could lead to different  
178 temporal dynamics between  $\alpha$  and  $\beta$  contrary to the quasi-steady state hypothesis. To  
179 explore such a possibility, we analyzed our single-cell time-lapse trajectories (Figure  
180 1D) to measure  $\alpha$  and  $\beta$  for each cell. From our measurements of  $\alpha$ , we calculated  $f(\alpha)$ ,  
181 the expected value of  $\beta$  during steady-state growth at rate  $\alpha$ . We found that  $f(\alpha)$   
182 increased more quickly than  $\beta$ , with a roughly constant time delay of ~10 min between  
183 the two curves (Figure 1G). Thus, we modified our model in Eq. 3 by substituting the  
184 function between  $\alpha$  and  $\beta$  to be  $\beta(t) = f(\alpha(t - \Delta t))$ , where  $\Delta t$  is a constant that  
185 characterizes the time delay between  $\beta$  and  $\alpha$ . Fitting our experimental data with the  
186 time-delay model yielded almost perfect agreement with a time delay  $\Delta t = 11$  min  
187 (Figure 1H). Thus, the minimal time-delay model with a single free parameter is able to  
188 almost entirely recapitulate the quantitative features of SA/V dynamics.

189

190 To confirm that such a delay actually occurs, we utilized a library of *E. coli* strains with  
191 GFP reporting the expression from various promoters<sup>23</sup> and sought to directly quantify  
192 the dynamics of cytoplasmic and surface-related proteins as cells emerge from  
193 stationary phase. We tested two strains representing ribosomal proteins ( $P_{rplL}$ -GFP,  $P_{rpsU}$ -  
194 GFP), two representing other cytoplasmic proteins ( $P_{lacI}$ -GFP,  $P_{gyrB}$ -GFP), and two  
195 representing enzymes related to cell-wall synthesis ( $P_{mrcB}$ -GFP,  $P_{murA}$ -GFP). We grew  
196 each strain in LB overnight to saturation, then placed the cells directly into a  
197 microfluidic device surrounded by the supernatant from the overnight culture. We then  
198 switched the spent medium to fresh LB and monitored cell morphology and gene  
199 expression. In all six strains, GFP levels increased during growth, signifying increased  
200 expression. Consistent with our model prediction, the promoters of cytoplasmic  
201 proteins increased expression faster than those of the cell-wall genes (Figure 1I). We  
202 quantified the expression dynamics by calculating  $t_{10}$ , the time for each promoter to  
203 increase their relative expression by 10% (a proxy for promoter activation). The  
204 promoters for cytoplasmic proteins had  $t_{10} \sim 10$  min, whereas the promoters for cell-wall  
205 enzymes had  $t_{10} \sim 20$  min, a delay of  $\Delta t \sim 10$  min. Therefore, our direct measurement of  
206 gene expression dynamics confirmed a delay between  $\alpha$  and  $\beta$ , indicating differential  
207 regulation of the proteome (Figure 1F).

208

209 Our ability to fit the complex SA/V dynamics during batch culture with a simple model  
210 involving only the introduction of a time delay to the steady-state relationship between  
211  $\beta$  and  $\alpha$  suggests a simple picture of the initial stages of growth: as cells emerge from  
212 stationary phase, they devote more resources to synthesizing cytoplasmic components  
213 such as ribosomes than to surface components such as the cell wall. While the cell still  
214 must expand to allow space for these new cytoplasmic components, it does so with a  
215 minimal amount of surface growth by expanding predominantly in width rather than  
216 length, as volume scales approximately quadratically with width but only linearly with  
217 length. Indeed, in a typical rod-shaped cell, a two-fold change in volume requires only a  
218 47% increase in surface area if cells only increase in width, but 91% if cells increase only  
219 in length (Figure 1J, Methods). To test this reasoning, from our single-cell time-lapse  
220 results (Figure 1D), we directly calculated the possible range of  $\beta$  at each time point  
221 using the observed width, length and growth rate  $\alpha$  (Methods). At  $t = 0$ , the measured  $\beta$   
222 was close to its minimal possible value, characterizing a widening-dominant growth  
223 mode. By  $t = 60$  min, the measured  $\beta$  approximately reached its maximum under those  
224 growth conditions, consistent with the canonical elongation-dominant growth mode  
225 (Figure 1K). Thus, during outgrowth from stationary phase, cells transition their growth  
226 mode from widening to elongation.

227

228 **Cell widening during exit from stationary phase occurs even if width decreases at**  
229 **steady-state**

230 To further validate that the initial increase in width during outgrowth from stationary  
231 phase (Figure 1B,D,K) is governed by the delay between  $\alpha$  and  $\beta$ , rather than  
232 determined solely by the current nutrient condition after back dilution, we took  
233 stationary-phase cells grown in LB and diluted them into M9 glucose medium. Cells  
234 grown in LB always had widths larger than 0.94  $\mu\text{m}$  (Figure 1B), whereas cell widths  
235 during passage exclusively in M9 glucose never exceeded 0.94  $\mu\text{m}$  (Figure S1B). Thus, if  
236 the medium cells are diluted into dictated cell shape, cell width in M9 glucose would  
237 only decrease to below 0.94  $\mu\text{m}$ . However, we observed that by 30 min after dilution  
238 into M9 glucose from a stationary-phase LB culture, cell width increased by ~8% and  
239 reached ~1.03  $\mu\text{m}$  (Figure 1L), a value that was not achievable for cells always passaged  
240 in M9 glucose (Figure S1B). Afterward, cell width dropped to ~0.9  $\mu\text{m}$ , as expected for  
241 cells passaged in M9 glucose (Figure S1B), which we presume is mainly dictated by the  
242 M9 medium. Therefore, the initial widening of cells during outgrowth is not  
243 determined by external nutrients.

244

245 Outgrowth from stationary phase also involves changes such as altered expressions of  
246 stress-response genes, initiation of DNA replication, and different osmolalities of fresh  
247 versus stationary phase media. We tested these possibilities by repeating shape growth

248 curve measurements in a ppGpp<sup>0</sup> strain and a  $\Delta thyA$  strain. The ppGpp<sup>0</sup> strain is unable  
249 to synthesize ppGpp, a small nucleotide regulating stress-related genes<sup>1</sup>. The  $\Delta thyA$   
250 strain does not replicate DNA in the absence of external thymine<sup>24</sup>. In both strains,  
251 shape growth curves still exhibited similar outgrowth dynamics (Supplementary Text,  
252 Figure S1C-J). Systematically tuning the osmolality of media caused much smaller  
253 shape changes than those observed in the shape growth curves (Supplementary Texts,  
254 Figure S1K). Taken together, we conclude that the initial increase in width is likely  
255 governed by proteome re-allocation rather than external factors or other biological  
256 processes.

257

### 258 **Cells exiting from stationary phase reach a critical SA/V at their first division**

259 Previous work suggested that exponentially growing cells accumulate excess surface  
260 area material during the cell cycle, which then triggers division<sup>22</sup>. For a rod-shaped cell,  
261 division adds two hemispheric poles and increases SA by 4% without changing volume  
262 (Figure S2A). Since cells decrease their SA/V during outgrowth (Figure 1D), we thus  
263 asked whether the first division after cells exit from stationary phase was also related to  
264 their SA/V.

265

266 We diluted stationary-phase cells and placed them onto an agarose pad containing fresh  
267 LB, tracked single cells until their first division, and quantified their cellular

268 dimensions. Several models have been proposed for cell-size control during steady-  
269 state growth: the “sizer” model, in which cells divide at a fixed size; the “adder” model,  
270 in which cells add a fixed volume before division; and the “timer” model, in which cells  
271 grow for a fixed time before division<sup>25</sup>. The “sizer” model predicts that the volume at  
272 division is independent of initial volume, while the “adder” model predicts a slope of  
273 +1 between volume at division and initial volume. During outgrowth from stationary  
274 phase, we found that the volume at the first division negatively correlated with the  
275 initial volume (Figure 2A), deviating from both the sizer and adder models. Similar  
276 negative correlations were observed for cell length and surface area (Figure S2B,C). The  
277 timer model also failed to explain the data, with time to first division negatively  
278 correlated with initial cell volume (Figure 2B). However, the SA/V at division was  
279 approximately constant and independent of the initial SA/V (Figure 2C). Moreover, the  
280 normalized distribution of SA/V at division was much narrower compared to other  
281 cellular dimensions (Figure 2C,D), suggesting that the first division after stationary-  
282 phase exit is linked to a critical SA/V.

283

284 We further asked how division-related proteins were regulated during stationary-phase  
285 exit by tracking the dynamics of the key division protein FtsZ. We selected four *E. coli*  
286 strains, each containing a mutation in the actin homolog MreB that exhibited different  
287 mean widths and lengths during log-phase growth<sup>10</sup>. These mutants allowed us to

288 analyze division dynamics in cells of different widths. These strains also contained a  
289 chromosomally-integrated internal fusion of FtsZ to monomeric Venus (FtsZ<sup>sw</sup>-mVenus)  
290 at the native FtsZ locus<sup>10,26</sup>, allowing quantification of FtsZ abundance using  
291 fluorescence microscopy (Methods). All strains exhibited qualitatively similar cell shape  
292 dynamics as wild-type *E. coli*, despite their altered lengths and widths (Figure S2D,E,F).  
293 Total FtsZ fluorescence remained constant in the first 45 min post-dilution before  
294 starting to increase (Figure 2E), indicating that FtsZ synthesis started much later  
295 compared to other genes (Figure 1I). We also measured FtsZ dynamics in a time-lapse  
296 experiment with GFP fused to the FtsZ promoter ( $P_{ftsZ}$ -GFP)<sup>23</sup> and confirmed that FtsZ  
297 expression started ~50 min post-dilution (Figure S2G). Although the four MreB mutants  
298 had different levels of total FtsZ (Figure 2E), FtsZ concentration was quantitatively  
299 similar across the different strains (Figure 2E, inset), suggesting a conserved mechanism  
300 of FtsZ regulation independent of cell shape, consistent with previous measurements in  
301 exponential-phase cells<sup>10</sup>. In all strains, no FtsZ rings were observed until ~50 min post-  
302 dilution. Virtually all cells contained one FtsZ ring by ~100 min post-dilution (Figure  
303 2F), consistent with the observed timing of the first division after stationary-phase exit  
304 (Figure 2B). Taken together, these data indicate that FtsZ levels are upregulated  
305 concurrent with the need for division.

306

307 **SA/V dynamics are broadly conserved across width and length perturbations**



308 Since SA/V is dependent on both cell width and length, we asked whether chemically or  
309 genetically tuning cell width or length would affect SA/V dynamics. We first treated  
310 wild-type *E. coli* cells with a range of concentrations of cephalexin, a  $\beta$ -lactam antibiotic  
311 that inhibits the division-specific cell-wall synthesis enzyme PBP3<sup>27</sup>. Importantly, lower  
312 cephalexin concentrations (2.5  $\mu\text{g}/\text{mL}$  and 5  $\mu\text{g}/\text{mL}$ ) did not affect bulk growth rate for  
313 at least the first 10 h of growth. For the highest cephalexin concentration used (10  
314  $\mu\text{g}/\text{mL}$ ), cells started to lyse after 2 h, but growth was not affected prior to lysis (Figure  
315 S2H). Thus, cephalexin treatment does not directly affect any parameters in our model,  
316 despite the obvious perturbations in cell length. Shape growth curves showed that cells  
317 became longer due to inhibition of cell division in a concentration-dependent manner  
318 (Figure 2G). However, as cephalexin concentration was increased, cell width peaked at  
319 a lower value and began to decrease at an earlier time point (Figure 2H). As a result,  
320 SA/V was maintained throughout the first 3 h (Figure 2I) despite the marked changes in  
321 cell length. Therefore, cells collectively regulate width and length to maintain SA/V  
322 during growth.

323

324 We further studied cell shape changes in a library of *E. coli* mutants with a wide range  
325 of mean cell lengths and widths<sup>10</sup>. While the strains had different morphologies, they all  
326 exhibited similar SA/V dynamics as observed in wild-type *E. coli* (Supplementary Text,

327 Figure S2I-N), further indicating that the SA/V dynamics (Figure 1C) are conserved  
328 across genetic perturbations to cellular dimensions.

329

### 330 **SA/V dynamics are conserved across species and growth temperatures in rich media**

331 The basis of our interpretation of SA/V dynamics during batch culture should be  
332 generally applicable to species other than *E. coli*, as it does not make any assumptions  
333 about *E. coli*-specific pathways. Hence, we predicted that a similar initial decrease in  
334 SA/V upon outgrowth from stationary phase should generally occur. We thus expanded  
335 our shape growth curve measurements to a variety of other species and conditions. We  
336 quantified shape growth curves for the Gram-negative bacteria *Vibrio cholerae* and  
337 *Caulobacter crescentus*, both of which form slightly curved rods, the rod-shape Gram-  
338 positive bacterium *Bacillus subtilis*, and the eukaryote fission yeast *Schizosaccharomyces*  
339 *pombe*. In all species we tested, SA/V dynamics were similar to those in *E. coli*, with  
340 SA/V decreasing when cells resumed growth, and then gradually recovering when cell  
341 growth slowed down again (Supplementary Text, Figure S3A-E).

342

343 Bacterial cell size during steady-state growth is thought to be relatively constant as  
344 growth rate changes across temperatures<sup>5</sup>. Nonetheless, we still found that *E. coli* cells at  
345 30, 37, and 42 °C had different cellular dimensions and SA/V values. At all  
346 temperatures, cells still obeyed similar SA/V dynamics (Supplementary Text, Figure

347 S3F,G). Taken together, the initial decreases of SA/V appear to be general across  
348 microbial species, growth temperatures, and cell shapes and sizes, indicating that as  
349 cells accelerate in growth, volume synthesis always increases more quickly than surface  
350 synthesis.

351

### 352 **SA/V regulation is dependent on nutrient conditions**

353 We next asked whether medium composition affects SA/V dynamics, considering that  
354 steady-state cell shape is nutrient-dependent<sup>6</sup>. We quantified shape growth curves in  
355 M9 media supplemented with different carbon/nitrogen sources that support different  
356 growth rates. Overall, in low-nutrient conditions with slower growth rates,  $\Delta t$  was close  
357 to zero and SA/V remained largely constant, despite substantial changes in cell width  
358 and length (Supplementary Text, Figure S4A-E). Richer nutrient conditions supported  
359 faster growth rates and led to larger changes in SA/V and non-zero  $\Delta t$  values  
360 (Supplementary Text, Figure S4F-H). Since cell shape changes occurred even in defined  
361 media with a single carbon source (Figure S4C,D), the observed cellular dimension  
362 changes across shape growth curves are not likely due to diauxic shifts caused by  
363 nutrient consumption, but rather related to the dynamics of proteome composition as  
364 growth rate changes. A more complex panel of nutrients that support faster growth  
365 likely requires a larger shift in proteome composition (Figure 1F), driving a larger range  
366 of SA/V changes (Figure S4I).

367

368 **Time-delay model quantitatively predicts SA/V decreases due to inhibiting cell-wall**  
369 **synthesis**

370 We next sought to test predictions of our time-delay model experimentally. In our  
371 model, reducing  $\beta$  (without changing  $\alpha$ ) predicted that the shape growth curve would  
372 exhibit larger SA/V decreases during the first 2 h, with a final SA/V when cells returned  
373 to stationary phase lower than the initial value (Figure 3A). The *E. coli* cytoplasm is  
374 surrounded by the cell envelope, constituted of three layers: the cell wall, and two  
375 membranes on either side of the cell wall. The cell wall mainly consists of  
376 peptidoglycan, and the membranes are constituted by lipids, proteins, and  
377 lipopolysaccharides. Since in most conditions the synthesis of peptidoglycan is more  
378 energetically costly compared to lipids<sup>28</sup>, we hypothesized that that altering cell-wall  
379 synthesis would have a larger effect on  $\beta$ .

380

381 To validate our model prediction, we treated cells with multiple antibiotics that inhibit  
382 cell-wall synthesis and asked whether the SA/V changes were consistent with the model  
383 predictions. We first treated MG1655 cells grown in LB with A22<sup>29</sup>, a small molecule  
384 inhibiting the actin homolog MreB and therefore affecting the spatial pattern of new cell  
385 wall incorporation. Sub-lethal concentrations of A22 did not affect growth rate during  
386 the first 3 h of growth, but cells treated with A22 exhibited dose-dependent increases in

387 cell width compared to the non-treated control (Figure S5A), as previously shown <sup>30</sup>.  
388 Interestingly, the increase in cell width was accompanied by relatively lower increases  
389 in cell length (Figure S5B), which partially compensated for the decrease in SA/V.  
390 Together, the inhibition of cell-wall synthesis by A22 caused SA/V to drop in a dose-  
391 dependent fashion (Figure 3B), as predicted by our model (Figure 3A). Fitting the A22  
392 shape growth curves to our model was indeed consistent with a dose-dependent  
393 decrease  $\beta$  (Figure 3B).  $\Delta t$  was not affected except at the highest A22 concentration,  
394 which resulted in a ~50% longer time delay (Table S2), presumably because higher A22  
395 concentrations require further proteome redistribution. We also tested two other cell-  
396 wall synthesis inhibitors, fosfomicin and mecillinam. Fosfomicin inhibits MurA, the  
397 enzyme catalyzing the first committed step of peptidoglycan biosynthesis<sup>31,32</sup>, and  
398 mecillinam specifically targets PBP2, a transpeptidase that crosslinks new cell-wall  
399 material<sup>33</sup>. In both cases, we observed similar changes to shape growth curves as with  
400 A22 treatment (Figure S5C,D).

401

402 Since cells grown in M9 glucose exhibited largely constant SA/V and virtually no time  
403 delay (Figure S4A), we asked whether inhibiting SA synthesis would affect their SA/V  
404 dynamics by treating cells grown in M9 glucose with A22. In this case, A22 also caused  
405 a similar drop in SA/V (Figure 3C) and mean length (Figure S5E), and cell width now  
406 increased as opposed to the slight decrease in the A22-free control (Figure S5F). Thus,

407 the relatively small range of SA/V changes observed in M9 glucose (Figure S4A) was  
408 indeed because the proteome composition for surface area and volume synthesis was  
409 largely balanced in M9 glucose. Nonetheless, perturbations such as A22 treatment can  
410 still break this proteome balance and alter SA/V more substantially. Fitting the A22  
411 SA/V dynamics to our model also showed that at high A22 concentrations, in addition  
412 to decreased  $\beta$  (Table S2),  $\Delta t$  became non-zero (Figure 3C), suggesting that cells have to  
413 re-allocate their proteome composition to accommodate inhibition of cell-wall synthesis.  
414  
415 Cell wall synthesis can also be altered genetically. In *V. cholerae*, activation of a histidine  
416 kinase/response regulator two-component system, WigK/WigR, increases expression of  
417 many cell-wall synthesis genes and elevates cell-wall synthesis<sup>34</sup>. We therefore  
418 quantified the shape growth curves of *V. cholerae* strains with a range of cell-wall  
419 synthesis capacities. Compared to wildtype, overexpression of WigR increased SA/V  
420 (Figure 3D), mainly through decreased cell width. Overexpression of WigR<sup>D78E</sup>, a  
421 phosphomimetic version of WigR, further increases cell wall synthesis<sup>34</sup>, and SA/V  
422 increased even more as expected (Figure 3D), accompanied by further decreases in cell  
423 width. By contrast, deletion of WigR slows down cell wall synthesis, and we observed  
424 decreases in SA/V similar to those during treatment of *E. coli* with wall-acting  
425 antibiotics (Figure 3D). Therefore, genetically perturbing cell-wall synthesis affects  $\beta$   
426 and therefore SA/V dynamics as predicted by our model.

427

428 We next tested whether inhibiting lipid synthesis would have similar effects on SA/V  
429 dynamics. While it has been previously shown that inhibiting fatty acid synthesis via  
430 treatment with cerulenin alters cell morphology<sup>35</sup>, those experiments were performed in  
431 a regime (cerulenin concentration >50  $\mu\text{g}/\text{mL}$ ) in which growth rates were strongly  
432 affected (Figure S5G). In the context of our model, at lower concentrations of cerulenin  
433 (<10  $\mu\text{g}/\text{mL}$ ) where growth rates remained unaffected (Figure S5G), we did not observe  
434 noticeable changes in cellular dimensions after 2 h of growth (Figure S5H). Similarly, in  
435 cell wall-deficient spheroplasts<sup>36</sup>, surface area was only limited by lipid synthesis, and  
436 those cells exhibited increased, rather than decreased, SA/V during outgrowth from  
437 stationary phase (Supplementary Text, Figure S5I). We further analyzed previously  
438 published proteome datasets<sup>11,37</sup>, and found that levels of lipid synthesis proteins, but  
439 not peptidoglycan synthesis proteins, increased monotonically with growth rate  
440 (Supplementary Text, Figure S5J-L). Taken together, lipid biosynthesis protein levels are  
441 likely directly linked to growth rate, and cell envelope growth is limited by cell wall  
442 rather than membrane synthesis.

443

#### 444 **Inhibiting translation increases the time delay between volume and surface growth**

445 The addition of the time delay  $\Delta t$  was a critical modification to our model in order to fit  
446 our experimental shape growth curve data (Figure 1H, Figure S1A). We therefore asked

447 whether modifying  $\Delta t$  would have observable effects on SA/V dynamics. By increasing  
448  $\Delta t$  from 11 to 25 min, our model predicted that the minimal SA/V reached in log phase  
449 would decrease, while the final SA/V when cells enter stationary phase would increase  
450 (Figure 4A). Such non-monotonic changes to SA/V dynamics are somewhat counter  
451 intuitive, highlighting the biological relevance of the time delay. The initial SA/V drop  
452 after exiting stationary phase is primarily due to the quick increase in  $\alpha$ . While  $\beta$  also  
453 increases, the time delay between  $\alpha$  and  $\beta$  causes  $V$  to grow faster than  $A$ , leading to  
454 decreased SA/V. Therefore, a larger  $\Delta t$  means that  $V$  increases more before  $A$  growth  
455 catches up, resulting in an even lower SA/V in log phase. As for the terminal SA/V, it is  
456 dependent on  $\frac{\int dA/dt}{\int dV/dt}$ , an integral effect that depends on the entirety of the growth  
457 dynamics.  $\frac{dV}{dt}$  only depends on  $\alpha$  and remains unaffected, while  $\frac{dA}{dt} = \beta V(t) =$   
458  $f(a(t - \Delta t))V(t)$ . Increasing  $\Delta t$  leads to increased  $\int dA/dt$  and eventually a higher  
459 terminal SA/V.

460

461 We tested these predictions by treating cells with low levels of chloramphenicol, a  
462 translational inhibitor, based on our inference that  $\Delta t$  is mainly determined by rates of  
463 proteome re-allocation (Figure 1F). Although inhibiting protein translation inevitably  
464 affected both  $\alpha$  and  $\beta$ , at very low chloramphenicol concentrations ( $\sim 0.01$ - $0.05$ X minimal  
465 inhibitory concentration), cell growth was largely unaltered, and the SA/V dynamics  
466 matched our model predictions: increasing chloramphenicol concentrations increased



467  $\Delta t$  by ~70%, while  $\beta$  only changed <5% across conditions (Figure 4B). In these cases, the  
468 changes in SA/V were largely dictated by the relatively larger cell widths under  
469 chloramphenicol treatment (Figure S6A), as cell length followed very similar trends  
470 across concentrations (Figure S6B). Higher chloramphenicol concentrations  
471 substantially reduced growth rate and led to even lower SA/V in log phase (Figure  
472 S6C). Model fitting found that the reduced SA/V was also mainly due to increased  $\Delta t$   
473 (Figure S6C), as  $\beta$  changed less than 10% (Table S2). Thus, our shape growth curves  
474 with chloramphenicol treatment provide further validation of our model predictions,  
475 and demonstrate that tuning  $\Delta t$  has observable effects, rather than merely acting as a  
476 fitting parameter.

477

478 **Discussion**

479

480 Although much work has been done to unveil the molecular players determining cell  
481 morphology at steady states, an approach unifying cell morphology and growth rates in  
482 dynamic environments is still lacking. In this study, our time-delay model of SA/V  
483 dynamics accurately predicted how cell size responded to growth rate changes, and  
484 was generally applicable across many species and growth conditions. The minimal  
485 assumption of a single, constant time delay between volume and surface area synthesis  
486 quantitatively recapitulated the complex SA/V dynamics (Figure 1C, S3, S4), and  
487 predicted SA/V changes under perturbations (Figure 3, 4). While previous studies have  
488 shown that cells adopt different steady-state SA/V values across growth conditions<sup>6,22</sup>,  
489 our work further reveals that the quantitative dynamics of SA/V under environmental  
490 perturbations are based on global resource allocation and the temporal dependence  
491 between surface area and volume growth (Figure 1I). Our model thus has the potential  
492 to quantitatively describe other dynamic biological processes that scale with cell  
493 volume<sup>38</sup>.

494

495 While we obtained the time delay between surface area and volume synthesis ( $\Delta t$ ) via  
496 model fitting, systematically tuning  $\Delta t$  conferred non-monotonic changes in SA/V  
497 dynamics (Figure 4A,B), highlighting its biological relevance. Indeed, we were able to

498 quantify the delay of surface area growth compared to volumetric growth by directly  
499 tracking protein expression in single cells (Figure 1G), and the delay was observed  
500 previously when cells were switched from one steady state to another<sup>22</sup>. Inhibiting  
501 protein translation increased  $\Delta t$  (Figure 4B), suggesting that surface area synthesis was  
502 delayed due to a slower regulation of surface area synthesis-related enzymes. The  
503 connection between  $\Delta t$  and changes in growth rate is complex, since higher growth  
504 rates may require larger shifts in proteome, but also speeds up proteome turnover. Thus,  
505  $\Delta t$  does not necessarily have a simple correlation with growth rates. Other factors, such  
506 as cell-wall precursor synthesis and insertion, could also alter  $\Delta t$  in addition to  
507 proteome changes. It remains to be explored why and how surface area and volume  
508 synthesis rates are differentially modulated, and the ways in which such a delay can be  
509 beneficial for cells.

510

511 Our model predicts that upon growth resumption, cells should always increase in  
512 width, as surface area synthesis is limiting and increasing width rather than length  
513 poses a lower demand for surface area material (Figure 1J). We observed such width  
514 increases after diluting stationary-phase cells into fresh media across all species and  
515 experimental conditions (Figure 1B,D,L, S3, S4). Similar changes in width have been  
516 reported in growth-inhibited cells due to the presence of an antibiotic, in which *E. coli*  
517 cells resumed growth after washing out the antibiotic and cell width increased prior to

518 length increase<sup>39</sup>. The initial widening of cells is likely related to active growth and the  
519 subsequent imbalance between surface area and volume synthesis. In *E. coli*, such  
520 widening has been linked to altered cell wall insertion patterns governed by changes in  
521 MreB localization patterns<sup>9,10</sup>, providing a potential molecular mechanism in response to  
522 limited surface area synthesis. While DNA replication is a central process in cell  
523 proliferation and has implications in cell-size determination<sup>6,40</sup>, we have shown that cell  
524 shape remodeling can be independent of DNA replication (Figure S1G-J), at least in the  
525 initial 2 h of shape growth curves, indicating that the effect of DNA abundance on cell  
526 shape potentially manifests on a different time scale or is growth dependent. Regardless,  
527 our findings strongly suggest that the dynamic coordination between surface area and  
528 volume growth dictates cell shape.

529  
530 *E. coli* cell division at steady state is well described by the adder model<sup>41</sup>. However, for  
531 cells growing out of stationary phase, we observed that cells did not add a constant  
532 volume, surface area, or length (Figure 2A, Figure S2B,C), nor did they divide at a fixed  
533 size or after a fixed time interval (Figure 2A,B). Instead, cell division occurred at a given  
534 SA/V (Figure 2C,D), highlighting the biological relevance of SA/V regulation. The key  
535 division protein, FtsZ, was upregulated concurrently with the need for cell division  
536 (Figure 2E,F, S2G), consistent with previous work showing that a threshold of FtsZ is  
537 required for cell division<sup>42,43</sup>. The dynamics of FtsZ were further delayed compared to

538 other cell-wall synthesis genes (Figure 1I, S2G), reinforcing the idea that gene  
539 expression during growth resumption is temporally regulated to allow cells to prioritize  
540 volumetric growth over surface area synthesis or division.  
541  
542 Our model of SA/V dynamics links cell width and length, even though the two  
543 dimensions are regulated by distinct molecular machineries<sup>14,15,33</sup>. Interestingly,  
544 perturbations known to increase cell width or length also led to decreases in the other  
545 dimension (Figure 2G,H, S5A,B,E,F). Larger cell width and length both decrease SA/V,  
546 and a corresponding decrease in cell length or width can compensate for an increase in  
547 the other to maintain SA/V. Therefore, despite the seemingly disjoint nature of cell  
548 width and length regulation in rod-shaped cells, the global resource limitation on  
549 surface area growth poses constraints on the two dimensions. From an evolutionary  
550 perspective, bacterial cells constantly encounter feast or famine conditions, and  
551 therefore optimize the resource allocation strategies through regulations between  
552 surface area and volume growth. Rod-like shapes allow cells to efficiently tune SA/V via  
553 two disparate growth modes (Figure 1J), which potentially confers evolutionary  
554 benefits compared to other shapes. In eukaryotic cells, a nuclear transporter receptor  
555 serves as a sensor of SA/V<sup>44</sup>, and it remains to be discovered whether similar global  
556 SA/V sensors exist in bacterial cells, which would provide opportunities to reveal new

557 connections between cell physiology, size, and fundamental mechanisms of

558 morphogenesis.

559

## 560 **Methods**

561

### 562 **Strains and media**

563 Strains used in this study are described in Table S1. For routine culturing, all cells were  
564 grown in lysogeny broth (LB) at 37 °C unless otherwise specified. *C. crescentus* cells  
565 were grown in PYE (peptone-yeast extract) media at 30 °C as previously described<sup>22</sup>,  
566 and *S. pombe* cells were grown in YES255 media at 30 °C. Antibiotics (Sigma Aldrich, St.  
567 Louis, MO, USA) were used at the concentrations noted in the text. IPTG was used at a  
568 final concentration of 1 mM for *V. cholerae* cells. Thymine was added at a final  
569 concentration of 500 µg/mL for the *E. coli*  $\Delta$ *thyA* strain. For minimal media, glucose or  
570 other carbon sources were added at final concentration of 0.4%, six amino acids (L-  
571 methionine, L-histidine, L-arginine, L-proline, L-threonine, and L-tryptophan) were  
572 added to final concentrations of 500 µg/mL each, and casamino acids were added to a  
573 final concentration of 3% (w/v).

574

575 Strains were inoculated from freezer stocks into test tubes with 3 mL of media and  
576 supplemented with the appropriate antibiotics. The tubes were incubated overnight,  
577 except for cells grown in M9 acetate, which were incubated for 48 hours. Overnight  
578 cultures were back-diluted 1:200 into the same fresh medium for shape growth curves  
579 and growth curves measurements.

580

581 Spheroplasts were grown in LFLB (LB with additional 3.6% sucrose and 10 mM MgSO<sub>4</sub>)  
582 at 30 °C, with 60 µg/mL cefsulodin added to inhibit cell wall growth<sup>45</sup>. For shape  
583 growth curve measurements, overnight spheroplast cultures with cefsulodin were  
584 washed three times in fresh LFLB, and diluted 1:10 into LFLB with or without  
585 cefsulodin.

586

### 587 **Single-cell imaging**

588 For imaging, samples were taken from test tubes and placed on 1% agarose pads every  
589 15 min, and then imaged within 5 min. For membrane staining, a small aliquot of cells  
590 was incubated with FM 4-64 (Invitrogen) at a final concentration of 5 µg/mL for 5 min  
591 and spotted on agarose pads without washing. Phase-contrast images and  
592 epifluorescence images were acquired with a Nikon Ti-E inverted microscope (Nikon  
593 Instruments) using a 100X (NA 1.40) oil immersion objective and a Neo 5.5 sCMOS  
594 camera (Andor Technology). The microscope was outfitted with an active-control  
595 environmental chamber for temperature regulation (HaisonTech, Taipei, Taiwan).  
596 Images were acquired using µManager v.1.4<sup>46</sup>.

597

### 598 **Morphological analyses**



599 The MATLAB (MathWorks, Natick, MA, USA) image processing code *Morphometrics*<sup>19</sup>  
600 was used to segment cells and to identify cell outlines from phase-contrast or  
601 fluorescence microscopy images. A local coordinate system was generated for each cell  
602 outline using a method adapted from *MicrobeTracker*<sup>47</sup>. Cell widths were calculated by  
603 averaging the distances between contour points perpendicular to the cell midline,  
604 excluding contour points within the poles and sites of septation. Cell length was  
605 calculated as the length of the midline from pole to pole. Cell volume and surface area  
606 were estimated from the local meshing results.

607

#### 608 **FtsZ fluorescence quantification**

609 Cells with a sandwich fusion of mVenus to FtsZ<sup>26</sup> were imaged in phase contrast and  
610 fluorescence using an ETGFP filter. FtsZ fluorescence was quantified by summing the  
611 intensity values of each pixel within the cell contour. FtsZ rings were identified as the  
612 peak of fluorescence intensity along the cell contour.

613

#### 614 **Population-level growth analyses**

615 To measure growth dynamics, overnight cultures were inoculated into 200  $\mu$ L of fresh  
616 media supplemented with the appropriate antibiotics in a clear 96-well plate. The plate  
617 was covered with an optical film, with small holes poked at the side of each well to  
618 allow aeration. Incubation and OD measurements were performed with an Epoch 2

619 plate reader (BioTek) at appropriate temperatures with continuous shaking and OD<sub>600</sub>  
620 measured at 7.5-min intervals. The growth rate was calculated as the slope of ln(OD)  
621 with respect to time after smoothing using a moving average filter of window size five.

622

### 623 **$\beta$ as a function of $\alpha$ at steady state**

624 Based on previous steady-state growth rate and SA/V measurements, steady-state SA/V  
625 linearly correlates with growth rate<sup>6</sup>. Since steady-state SA/V equals  $\beta/\alpha$ , and growth  
626 rate is  $\alpha$ ,  $\beta/\alpha$  is a linear function of  $\alpha$ . Therefore, based on SA/V measurements at two  
627 different growth rates, we can fit the function relating  $\beta$  to  $\alpha$ . In our measurements in LB,  
628 *E. coli* cells approaching stationary phase correspond to  $\alpha \sim 0$  and  $\beta/\alpha = 5.7 \mu\text{m}^{-1}$ . By  
629 diluting cells repeatedly, cells reached steady-state morphologies<sup>10</sup> for which  $\beta/\alpha = 3.8$   
630  $\mu\text{m}^{-1}$ , and the corresponding  $\alpha = 1.7 \text{ h}^{-1}$ . Thus, in LB, we have  $\beta/\alpha = 5.7 - 1.12\alpha$ , or  $\beta =$   
631  $\alpha(5.7 - 1.12\alpha)$ .

632

### 633 **SA/V as a function of width and length changes**

634 For calculations in Figure 1J and S2E, a cell with width  $w$  and length  $l$  was  
635 approximated by a cylindrical cell body with radius  $r = w/2$  and length  $l - 2r$ , and  
636 hemispherical caps on each end with radius  $r = w/2$ . In this scenario, the corresponding  
637 surface area of the cell is  $SA = 2\pi r(l - 2r) + 2 \times 2\pi r^2 = \pi w l$ , and the volume is  $V = \pi r^2(l - 2r)$   
638  $+ 4\pi r^3/3 = \pi w^2 l/4 - \pi w^3/12$ . For the initial cell,  $w = 1 \mu\text{m}$  and  $l = 5 \mu\text{m}$ .

639

## 640 Calculation of permissible range of $\beta$

641 In rod-shaped cells, given the above equations for  $V$  and  $A$ ,  $\frac{dV}{dt} = \left(\frac{\pi}{2}wl - \frac{\pi}{4}w^2\right)\frac{dw}{dt} +$

642  $\frac{\pi}{4}w^2\frac{dl}{dt} = \alpha\left(\frac{\pi}{4}w^2l - \frac{\pi}{12}w^3\right)$ , and  $\frac{dA}{dt} = \pi l\frac{dw}{dt} + \pi w\frac{dl}{dt} = \beta\left(\frac{\pi}{4}w^2l - \frac{\pi}{12}w^3\right)$ . During growth,

643  $\frac{dw}{dt} \geq 0$  and  $\frac{dl}{dt} \geq 0$ . Solving for the linear optimization with the above constraints gives a

644 permissible range of  $\beta$  that is dependent on  $w$ ,  $l$ , and  $\alpha$ , with minimum  $\beta$  corresponding

645 to  $\frac{dl}{dt} = 0$ , and maximum  $\beta$  corresponding to  $\frac{dw}{dt} = 0$ .

646

## 647 DAPI staining and fluorescence quantification

648 Cells were grown in the same conditions as in single-cell imaging experiments. At each

649 time point, 1 mL of each sample was taken, pelleted at 6,500 rcf for 1 min, and fixed via

650 resuspension in 500  $\mu$ L 70% ethanol and incubation for 15 min at room temperature.

651 Cells were then pelleted at 6,500 rcf for 1 min, resuspended in 500  $\mu$ L PBS, with 4',6-

652 diamidino-2-phenylindole (DAPI) added to a final concentration of 1  $\mu$ g/mL, and

653 incubated in the dark for 15 min. Cells were washed with PBS twice by pelleting at

654 6,500 rcf for 1 min followed by resuspension. Cells were spotted onto 1% agarose pads

655 and imaged in phase contrast and fluorescence using a DAPI filter. DAPI fluorescence

656 was quantified by summing the intensity values of each pixel within the cell contour,

657 and then normalizing to the corresponding intensity in the control.

658

659 **qPCR**

660 To estimate the relative replication rate of the chromosome, we quantified the copy  
661 numbers of 16 genetic loci via qPCR and fitted their log(relative abundance) to their  
662 corresponding distances to *terC*, as previously described<sup>18</sup>. The cells were harvested at  
663 six different time points (in the overnight culture, and 30, 60, 90, 120, and 150 min after  
664 1:200 dilution), and the DNA was extracted using the genomic DNA purification kit  
665 (Qiagen). The relative abundances of chromosomal loci were quantified by qPCR, using  
666 the EvaGreen qPCR kit (Bio-rad). The qPCR probes used were as previously described<sup>47</sup>.

667

668 **Figures**

669

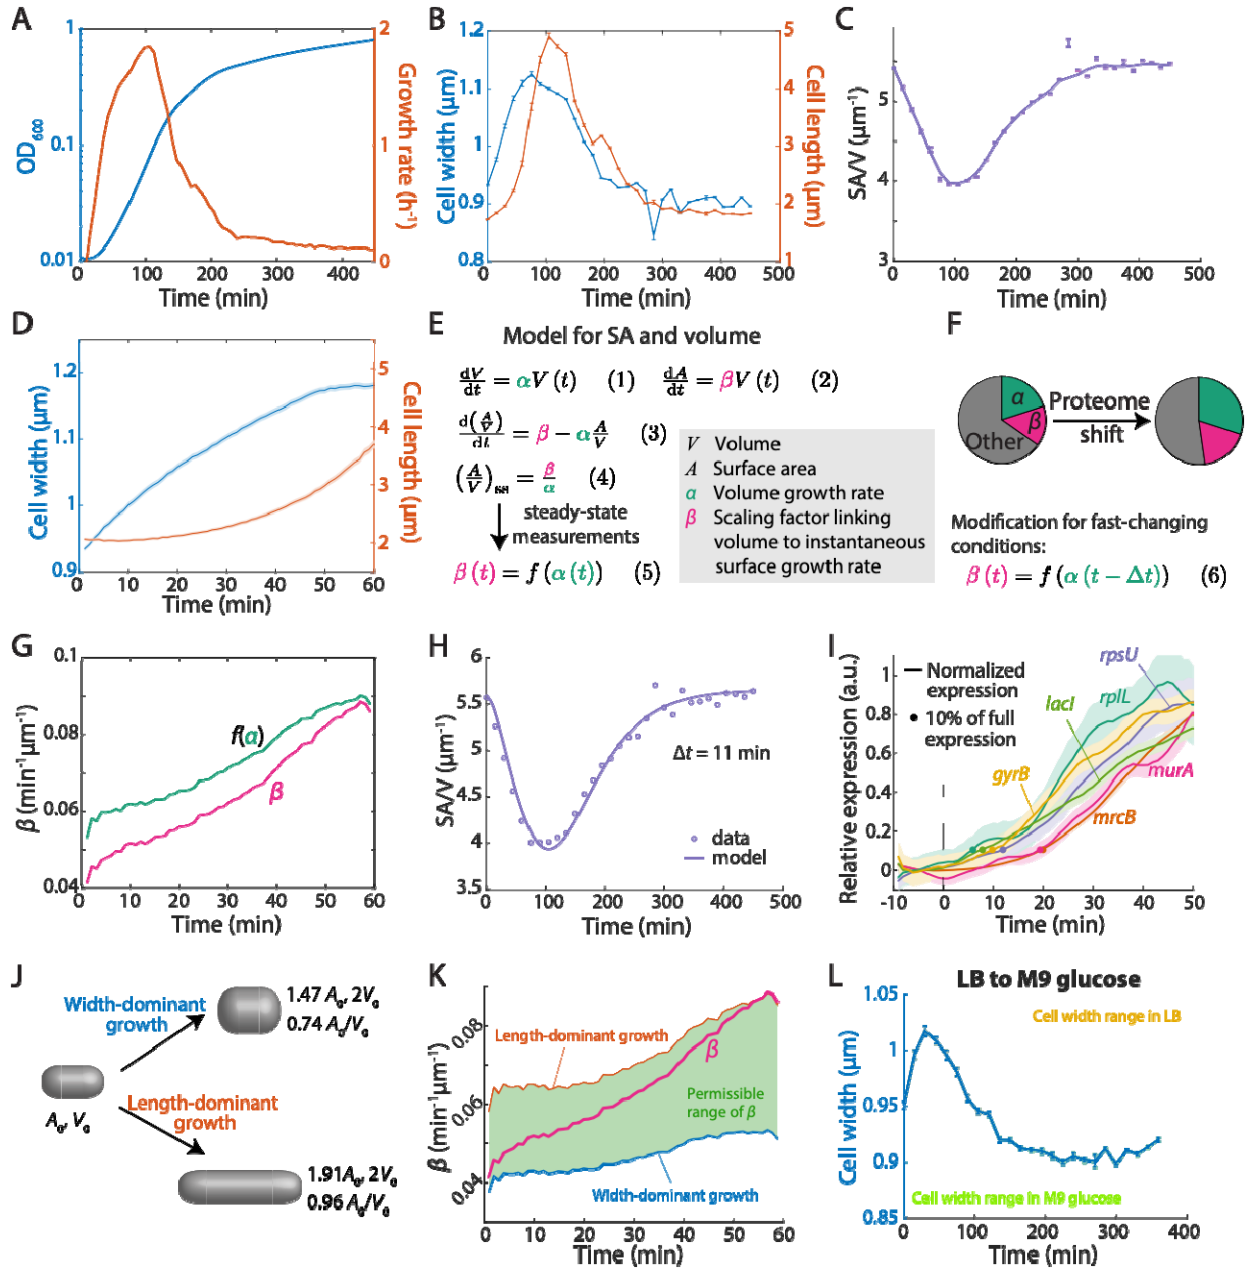

670

671 **Figure 1: A time-delay model explains the relative dynamics of surface area and**

672 **volume synthesis in batch cultures.**

- 673 A) Growth curve and the corresponding growth rate of an *E. coli* MG1655 batch  
674 culture after diluting the overnight culture 1:200 into fresh LB. Growth rate peaks  
675 at ~100 min post-dilution, and then slowly decreases.
- 676 B) Shape growth curves (cell width and length as a function of time) for the same  
677 culture in (A). Cell width starts to increase earlier compared to length. Data  
678 points are mean  $\pm$  standard error of mean (s.e.m.) for  $n > 200$  single cells.
- 679 C) SA/V as a function of time for the same culture in (B). SA/V decreased as cells  
680 resume growth, and then slowly increased back to the initial value when cell  
681 growth slowed down. Data points are mean  $\pm$  s.e.m. with  $n > 200$  single cells, and  
682 the line is smoothed as a guide to the eye.
- 683 D) Single-cell time-lapse imaging of stationary-phase MG1655 cells diluted onto an  
684 agarose pad containing fresh LB. Each cell exhibited similar width and length  
685 dynamics as in the bulk culture in (B). Solid lines and the corresponding shaded  
686 areas are mean  $\pm$  s.e.m. with  $n > 100$  single cells.
- 687 E) A conceptual model for SA/V regulation in cells. The synthesis rates of both  
688 surface and volume scale with current cell volume (Eq. 1,2), predicting that the  
689 time derivative of A/V depends on  $\alpha$ ,  $\beta$ , and the current A/V (Eq. 3). Steady state  
690 A/V is therefore dictated by the ratio between  $\beta$  and  $\alpha$  (Eq. 4). Using previous  
691 experimental steady-state SA/V measurements,  $\beta$  can be parameterized as a  
692 function of  $\alpha$  in steady state (Eq. 5).

- 693 F) Given that changes in growth rate ( $\alpha$ ) are accompanied by shifts in proteome  
694 composition, our model assumes that the shift is more heavily weighted toward  
695 cytoplasmic components than surface area components, thereby causing a  
696 delayed change in  $\beta$ , which can be approximated by introducing a constant time  
697 delay in the function relating  $\beta$  to  $\alpha$  (Eq. 6).
- 698 G) From the single-cell data in (D), the experimentally measured  $\beta$  exhibited a delay  
699 of approximately 10 min compared to the steady-state  $\beta$  determined by Eq. 5 (i.e.  
700  $f(\alpha)$ ).
- 701 H) Fitting our time-delay model to the experimental data in (C) with  $\Delta t = 11$  min  
702 yielded an excellent fit.
- 703 I) Protein expression levels were measured using GFP fused to the respective  
704 promoters and normalized from 0 to 1. The cytoplasmic proteins increased in  
705 expression ~10 min earlier than the cell-wall synthesis proteins. Dots represent  
706 the time points at which expression had increased by 10%. Data are mean  $\pm$   
707 standard deviation (S.D.) with  $n > 100$  cells.
- 708 J) For a rod-shaped cell starting with surface area  $A_0$  and  $V_0$ , doubling its volume  
709 by expansion in width costs 47% increase in surface area (top), whereas  
710 expansion in length requires a 91% increase in surface area (bottom). Therefore,  
711 an increase in width minimizes the surface area requirement for a given amount  
712 of volumetric growth.

713 K) Given the geometry and instantaneous growth rate ( $\alpha$ ) of cells in (D), to maintain  
714 rod-like shapes, only a certain range of  $\beta$  values are permissible (green;  
715 Methods). The actual value of  $\beta$  started close to its minimal possible value,  
716 characterizing a widening-dominant growth mode; by 60 min,  $\beta$  reached its  
717 maximum possible value, transitioning to an elongation-dominant growth mode.

718 L) Dilution of stationary-phase cells grown in LB into M9 glucose caused increased  
719 cell width, despite the fact that cells continuously passaged in M9 glucose always  
720 had lower cell width than the LB-grown stationary-phase cells. Data are mean  $\pm$   
721 s.e.m. with  $n > 100$  cells.



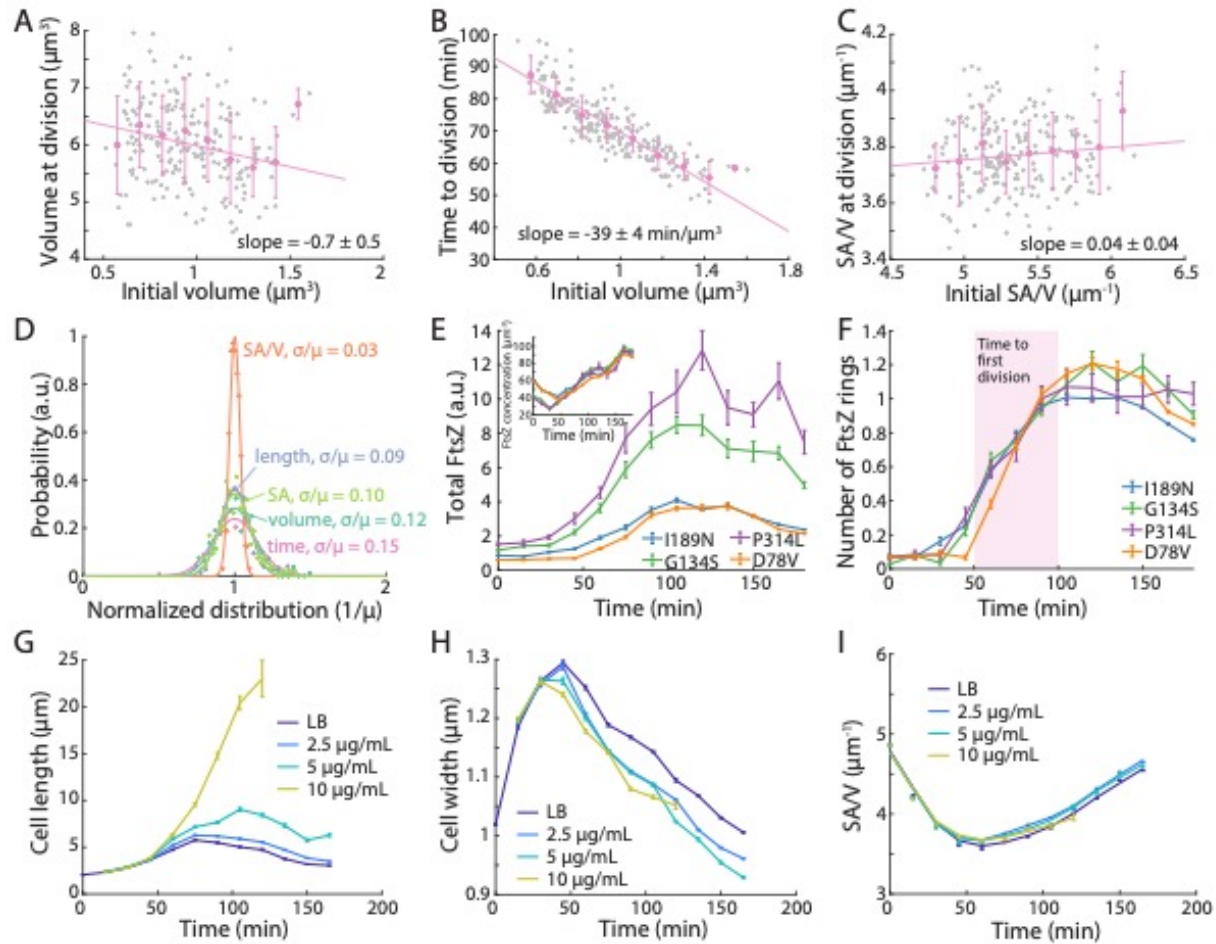

722

723 **Figure 2: SA/V dynamics are correlated with cell division, and are conserved across**

724 **cell morphologies.**

725 A) For cells exiting stationary phase, the volume at the first division was negatively

726 correlated with the starting volume, deviating from the “sizer” and “adder”

727 models. Gray dots are data points for  $n = 209$  individual cells, and pink data

728 points are binned mean and S.D. values, which were fit to a linear model, leading

729 to a slope of  $-0.7 \pm 0.5$  (mean  $\pm$  s.e.m., Pearson’s  $r = -0.22$ ,  $p = 0.001$ , Student’s  $t$ -

730 test).

731 B) The time to first division after stationary-phase exit was negatively correlated  
732 with the initial cell volume with a slope of  $-39 \pm 4 \text{ min}/\mu\text{m}^3$  (mean  $\pm$  s.e.m.,  
733 Pearson's  $r = -0.86$ ,  $p < 10^{-5}$ , Student's  $t$ -test), indicating that the first division was  
734 not regulated by time spent in fresh media. Gray dots are data points for  $n = 209$   
735 individual cells, and pink data points are binned mean and S.D. values.

736 C) The SA/V at the first division was largely constant and independent of the initial  
737 SA/V of the stationary-phase cell. Gray dots are data points for  $n = 209$  individual  
738 cells, and pink data points are binned mean and S.D. values, which were fit to a  
739 linear model, leading to a slope of  $-0.04 \pm 0.04$  (mean  $\pm$  s.e.m., Pearson's  $r = 0.11$ ,  $p$   
740  $= 0.12$ , Student's  $t$ -test).

741 D) Normalized distributions of cell length, SA, volume, SA/V, and time at first  
742 division after stationary-phase exit. SA/V had by far the narrowest distribution,  
743 suggesting that the first cell division after exiting stationary phase occurs  
744 precisely at a fixed SA/V.

745 E) FtsZ abundance was measured as total fluorescence intensity inside cells. The  
746 dynamics of FtsZ regulation were similar across mutants. FtsZ abundance did  
747 not change in the first  $\sim 50$  min, then increased to a maximum at  $\sim 100$  min. Inset:  
748 While larger cells tended to have lower SA/V and higher FtsZ levels, FtsZ  
749 concentrations were highly similar across shape mutants. Data points are mean  $\pm$   
750 s.e.m. with  $n > 200$  cells.

751 F) All strains started without FtsZ rings and did not possess a ring until ~50 min  
752 post-dilution, consistent with the onset of first divisions after stationary phase  
753 exit (B). By 100 min, virtually all cells had ~1 FtsZ ring. Data points are mean  $\pm$   
754 s.e.m. with  $n > 200$  cells.

755 G-I) Shape growth curves of *E. coli* MG1655 cells treated with sub-lethal  
756 concentrations of cephalixin. Cephalixin causes a dose-dependent increase in  
757 cell length (G), accompanied by decreased cell width (H). The increased lengths  
758 and decreased widths precisely maintain SA/V for all conditions (I), suggesting  
759 that SA/V is robust to perturbations in cellular dimensions. Data points are mean  
760  $\pm$  s.e.m. with  $n > 200$  cells.

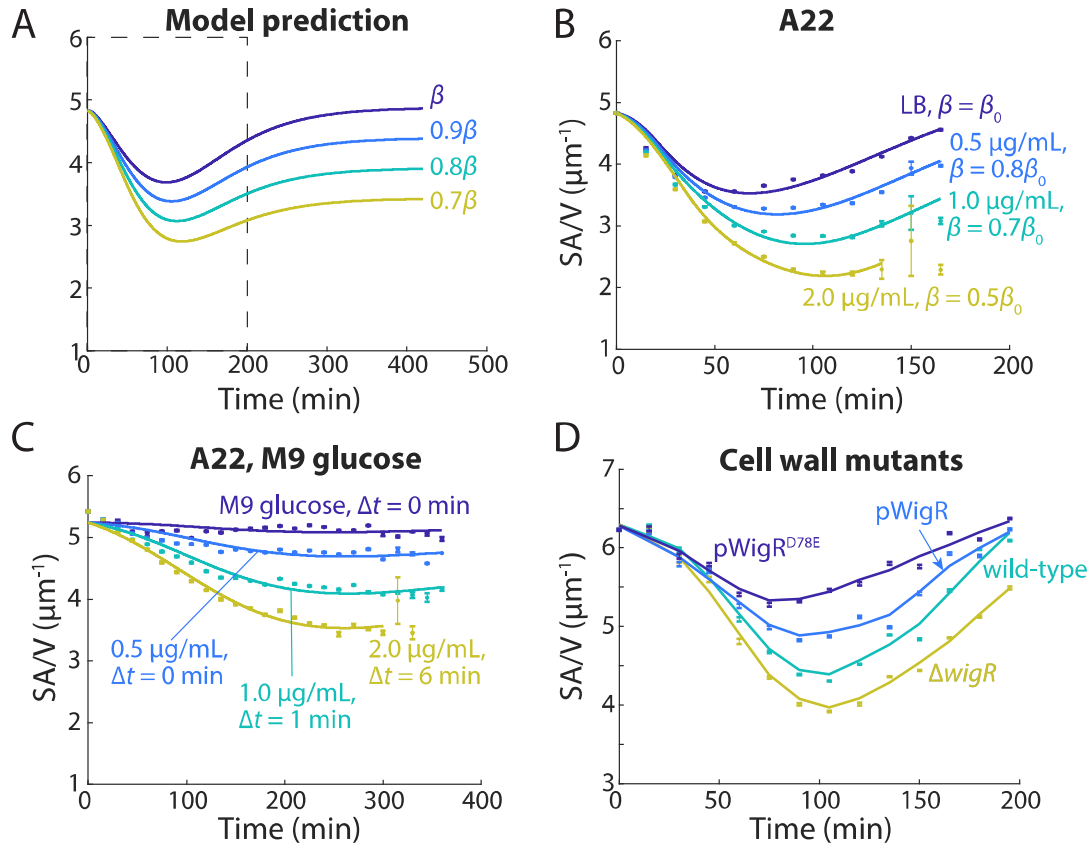

761

762 **Figure 3: Time-delay model quantitatively predicts SA/V decreases due to inhibiting**  
763 **cell-wall synthesis.**

764 A) The model predicts that decreasing  $\beta$  results in decreased SA/V over time.

765 B) Shape growth curves during A22 treatment in LB exhibited similar SA/V  
766 dynamics as predicted in (A).

767 C) Shape growth curves with A22 treatment in M9 glucose also exhibited decreases  
768 in SA/V, even though SA/V remained largely constant without A22. Higher A22  
769 concentrations also led to non-zero  $\Delta t$ , indicating that cells must adjust their  
770 proteome under inhibition of cell-wall synthesis.

771 D) Shape growth curves for *V. cholerae* cell-wall synthesis mutants. Overexpression  
772 of WigR (pWigR, pWigR<sup>D78E</sup>), which up-regulates cell wall synthesis without  
773 affecting growth, increased SA/V. By contrast,  $\Delta wigR$  cells have down-regulated  
774 cell-wall synthesis and exhibited lower SA/V.

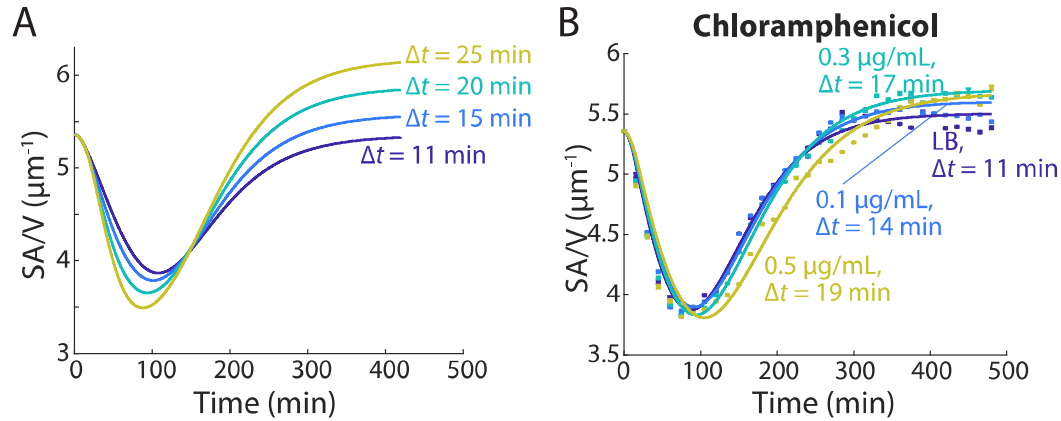

775

776 **Figure 4: Inhibiting translation increases the time delay between volume and surface**  
777 **growth.**

778 A) The model predicts that higher  $\Delta t$  leads to lower SA/V in log phase, but higher  
779 SA/V when cells enter stationary phase again.

780 B) Shape growth curves of MG1655 cells treated with low levels of  
781 chloramphenicol. The dose-dependent SA/V dynamics were consistent with  
782 model predictions, and model fitting resulted in longer  $\Delta t$  at higher doses. Data  
783 points are mean  $\pm$  s.e.m., with  $n > 200$ . Solid lines are best fits to the time-delay  
784 model.

785

786 **Acknowledgements**

787

788 The authors thank Alexandre Colavin, Linfeng Yang, Leigh Harris, Po-Yi Ho, and Petra  
789 Levin for helpful discussions, and Tobias Dörr and Suckjoon Jun for strains. This work  
790 was supported by NIH Director's New Innovator Awards DP2OD006466 (to K.C.H.),  
791 NSF CAREER Award MCB-1149328 (to K.C.H.), the Allen Center for Systems Modeling  
792 of Infection (to K.C.H.), and an Agilent Graduate Fellowship and a Stanford  
793 Interdisciplinary Graduate Fellowship (to H.S.). K.C.H. is a Chan Zuckerberg Biohub  
794 Investigator.

795

796 **Data availability statement**

797 The datasets generated during and/or analysed during the current study are available  
798 from the corresponding author on reasonable request.

799 **References**

800

801 1 Magnusson, L. U., Farewell, A. & Nyström, T. ppGpp: a global regulator in  
802 Escherichia coli. *Trends in microbiology* **13**, 236-242 (2005).

803 2 Sutterlin, H. A. *et al.* Disruption of lipid homeostasis in the Gram-negative cell  
804 envelope activates a novel cell death pathway. *Proceedings of the National Academy*  
805 *of Sciences* **113**, E1565-E1574 (2016).

806 3 Siegele, D. A. & Kolter, R. Isolation and characterization of an Escherichia coli  
807 mutant defective in resuming growth after starvation. *Genes & development* **7**,  
808 2629-2640 (1993).

809 4 Peters, J. M. *et al.* A comprehensive, CRISPR-based functional analysis of  
810 essential genes in bacteria. *Cell* **165**, 1493-1506 (2016).

811 5 Schaechter, M., Maaløe, O. & Kjeldgaard, N. O. Dependency on medium and  
812 temperature of cell size and chemical composition during balanced growth of  
813 *Salmonella typhimurium*. *Microbiology* **19**, 592-606 (1958).

814 6 Si, F. *et al.* Invariance of initiation mass and predictability of cell size in  
815 Escherichia coli. *Current Biology* **27**, 1278-1287 (2017).

816 7 Scott, M., Gunderson, C. W., Mateescu, E. M., Zhang, Z. & Hwa, T.  
817 Interdependence of cell growth and gene expression: origins and consequences.  
818 *Science* **330**, 1099-1102 (2010).



- 819 8 Peebo, K. *et al.* Proteome reallocation in *Escherichia coli* with increasing specific  
820 growth rate. *Molecular BioSystems* **11**, 1184-1193 (2015).
- 821 9 Colavin, A., Shi, H. & Huang, K. C. RodZ modulates geometric localization of the  
822 bacterial actin MreB to regulate cell shape. *Nature communications* **9**, 1280 (2018).
- 823 10 Shi, H. *et al.* Deep phenotypic mapping of bacterial cytoskeletal mutants reveals  
824 physiological robustness to cell size. *Current Biology* **27**, 3419-3429. e3414 (2017).
- 825 11 Erickson, D. W. *et al.* A global resource allocation strategy governs growth  
826 transition kinetics of *Escherichia coli*. *Nature* **551**, 119 (2017).
- 827 12 Young, K. D. The selective value of bacterial shape. *Microbiol. Mol. Biol. Rev.* **70**,  
828 660-703 (2006).
- 829 13 Typas, A., Banzhaf, M., Gross, C. A. & Vollmer, W. From the regulation of  
830 peptidoglycan synthesis to bacterial growth and morphology. *Nature Reviews*  
831 *Microbiology* **10**, 123 (2012).
- 832 14 Gitai, Z., Dye, N. & Shapiro, L. An actin-like gene can determine cell polarity in  
833 bacteria. *Proceedings of the National Academy of Sciences* **101**, 8643-8648 (2004).
- 834 15 Ursell, T. S. *et al.* Rod-like bacterial shape is maintained by feedback between cell  
835 curvature and cytoskeletal localization. *Proceedings of the National Academy of*  
836 *Sciences* **111**, E1025-E1034 (2014).
- 837 16 Bi, E. & Lutkenhaus, J. Cell division inhibitors SulaA and MinCD prevent  
838 formation of the FtsZ ring. *Journal of bacteriology* **175**, 1118-1125 (1993).

- 839 17 Harris, L. K., Dye, N. A. & Theriot, J. A. AC aulobacter MreB mutant with  
840 irregular cell shape exhibits compensatory widening to maintain a preferred  
841 surface area to volume ratio. *Molecular microbiology* **94**, 988-1005 (2014).
- 842 18 Zheng, H. *et al.* Interrogating the Escherichia coli cell cycle by cell dimension  
843 perturbations. *Proceedings of the National Academy of Sciences* **113**, 15000-15005  
844 (2016).
- 845 19 Ursell, T. *et al.* Rapid, precise quantification of bacterial cellular dimensions  
846 across a genomic-scale knockout library. *BMC biology* **15**, 17 (2017).
- 847 20 Ouzounov, N. *et al.* MreB orientation correlates with cell diameter in Escherichia  
848 coli. *Biophysical journal* **111**, 1035-1043 (2016).
- 849 21 Monds, R. D. *et al.* Systematic perturbation of cytoskeletal function reveals a  
850 linear scaling relationship between cell geometry and fitness. *Cell reports* **9**, 1528-  
851 1537 (2014).
- 852 22 Harris, L. K. & Theriot, J. A. Relative rates of surface and volume synthesis set  
853 bacterial cell size. *Cell* **165**, 1479-1492 (2016).
- 854 23 Zaslaver, A. *et al.* A comprehensive library of fluorescent transcriptional  
855 reporters for Escherichia coli. *Nature methods* **3**, 623 (2006).
- 856 24 Pritchard, R. & Zaritsky, A. Effect of thymine concentration on the replication  
857 velocity of DNA in a thymineless mutant of Escherichia coli. *Nature* **226**, 126  
858 (1970).

- 859 25 Willis, L. & Huang, K. C. Sizing up the bacterial cell cycle. *Nature Reviews*  
860 *Microbiology* **15**, 606 (2017).
- 861 26 Moore, D. A., Whatley, Z. N., Joshi, C. P., Osawa, M. & Erickson, H. P. Probing  
862 for Binding Regions of the FtsZ Protein Surface through Site-Directed Insertions:  
863 Discovery of Fully Functional FtsZ-Fluorescent Proteins. *J Bacteriol* **199**,  
864 doi:10.1128/JB.00553-16 (2017).
- 865 27 Spratt, B. G. Distinct penicillin binding proteins involved in the division,  
866 elongation, and shape of Escherichia coli K12. *Proceedings of the National Academy*  
867 *of Sciences* **72**, 2999-3003 (1975).
- 868 28 Stouthamer, A. A theoretical study on the amount of ATP required for synthesis  
869 of microbial cell material. *Antonie van Leeuwenhoek* **39**, 545-565 (1973).
- 870 29 Iwai, N., Nagai, K. & Wachi, M. Novel S-benzylisothiourea compound that  
871 induces spherical cells in Escherichia coli probably by acting on a rod-shape-  
872 determining protein (s) other than penicillin-binding protein 2. *Bioscience,*  
873 *biotechnology, and biochemistry* **66**, 2658-2662 (2002).
- 874 30 Gitai, Z., Dye, N. A., Reisenauer, A., Wachi, M. & Shapiro, L. MreB actin-  
875 mediated segregation of a specific region of a bacterial chromosome. *Cell* **120**,  
876 329-341 (2005).

- 877 31 Kahan, F. M., Kahan, J. S., Cassidy, P. J. & Kropp, H. The mechanism of action of  
878 fosfomycin (phosphonomycin). *Annals of the New York Academy of Sciences* **235**,  
879 364-386 (1974).
- 880 32 Marquardt, J. L. *et al.* Kinetics, stoichiometry, and identification of the reactive  
881 thiolate in the inactivation of UDP-GlcNAc enolpyruvoyl transferase by the  
882 antibiotic fosfomycin. *Biochemistry* **33**, 10646-10651 (1994).
- 883 33 Banzhaf, M. *et al.* Cooperativity of peptidoglycan synthases active in bacterial cell  
884 elongation. *Molecular microbiology* **85**, 179-194 (2012).
- 885 34 Dörr, T. *et al.* A cell wall damage response mediated by a sensor kinase/response  
886 regulator pair enables beta-lactam tolerance. *Proceedings of the National Academy of*  
887 *Sciences* **113**, 404-409 (2016).
- 888 35 Vadia, S. *et al.* Fatty acid availability sets cell envelope capacity and dictates  
889 microbial cell size. *Current Biology* **27**, 1757-1767. e1755 (2017).
- 890 36 Klieneberger, E. The natural occurrence of pleuropneumonia-like organism in  
891 apparent symbiosis with *Strrptobacillus moniliformis* and other bacteria. *The*  
892 *Journal of Pathology and Bacteriology* **40**, 93-105 (1935).
- 893 37 Schmidt, A. *et al.* The quantitative and condition-dependent *Escherichia coli*  
894 proteome. *Nature biotechnology* **34**, 104 (2016).
- 895 38 Levy, D. L. & Heald, R. Mechanisms of intracellular scaling. *Annual review of cell*  
896 *and developmental biology* **28**, 113-135 (2012).

- 897 39 van Helvoort, J. M. & Woldringh, C. L. Nucleoid partitioning in *Escherichia coli*  
898 during steady-state growth and upon recovery from chloramphenicol treatment.  
899 *Molecular microbiology* **13**, 577-583 (1994).
- 900 40 Ho, P.-Y. & Amir, A. Simultaneous regulation of cell size and chromosome  
901 replication in bacteria. *Frontiers in microbiology* **6**, 662 (2015).
- 902 41 Taheri-Araghi, S. *et al.* Cell-size control and homeostasis in bacteria. *Current*  
903 *Biology* **25**, 385-391 (2015).
- 904 42 Si, F. *et al.* Mechanistic origin of cell-size control and homeostasis in bacteria.  
905 *Current Biology* **29**, 1760-1770. e1767 (2019).
- 906 43 Sekar, K. *et al.* Synthesis and degradation of FtsZ quantitatively predict the first  
907 cell division in starved bacteria. *Molecular systems biology* **14** (2018).
- 908 44 Brownlee, C. & Heald, R. Importin  $\alpha$  partitioning to the plasma membrane  
909 regulates intracellular scaling. *Cell* **176**, 805-815. e808 (2019).
- 910 45 Billings, G. *et al.* De novo morphogenesis in L-forms via geometric control of cell  
911 growth. *Molecular microbiology* **93**, 883-896 (2014).
- 912 46 Stuurman, N., Amdodaj, N. & Vale, R.  $\mu$ Manager: open source software for light  
913 microscope imaging. *Microscopy Today* **15**, 42-43 (2007).

914 47 Sliusarenko, O., Heinritz, J., Emonet, T. & Jacobs-Wagner, C. High-throughput,  
915 subpixel precision analysis of bacterial morphogenesis and intracellular spatio-  
916 temporal dynamics. *Molecular microbiology* **80**, 612-627 (2011).  
917

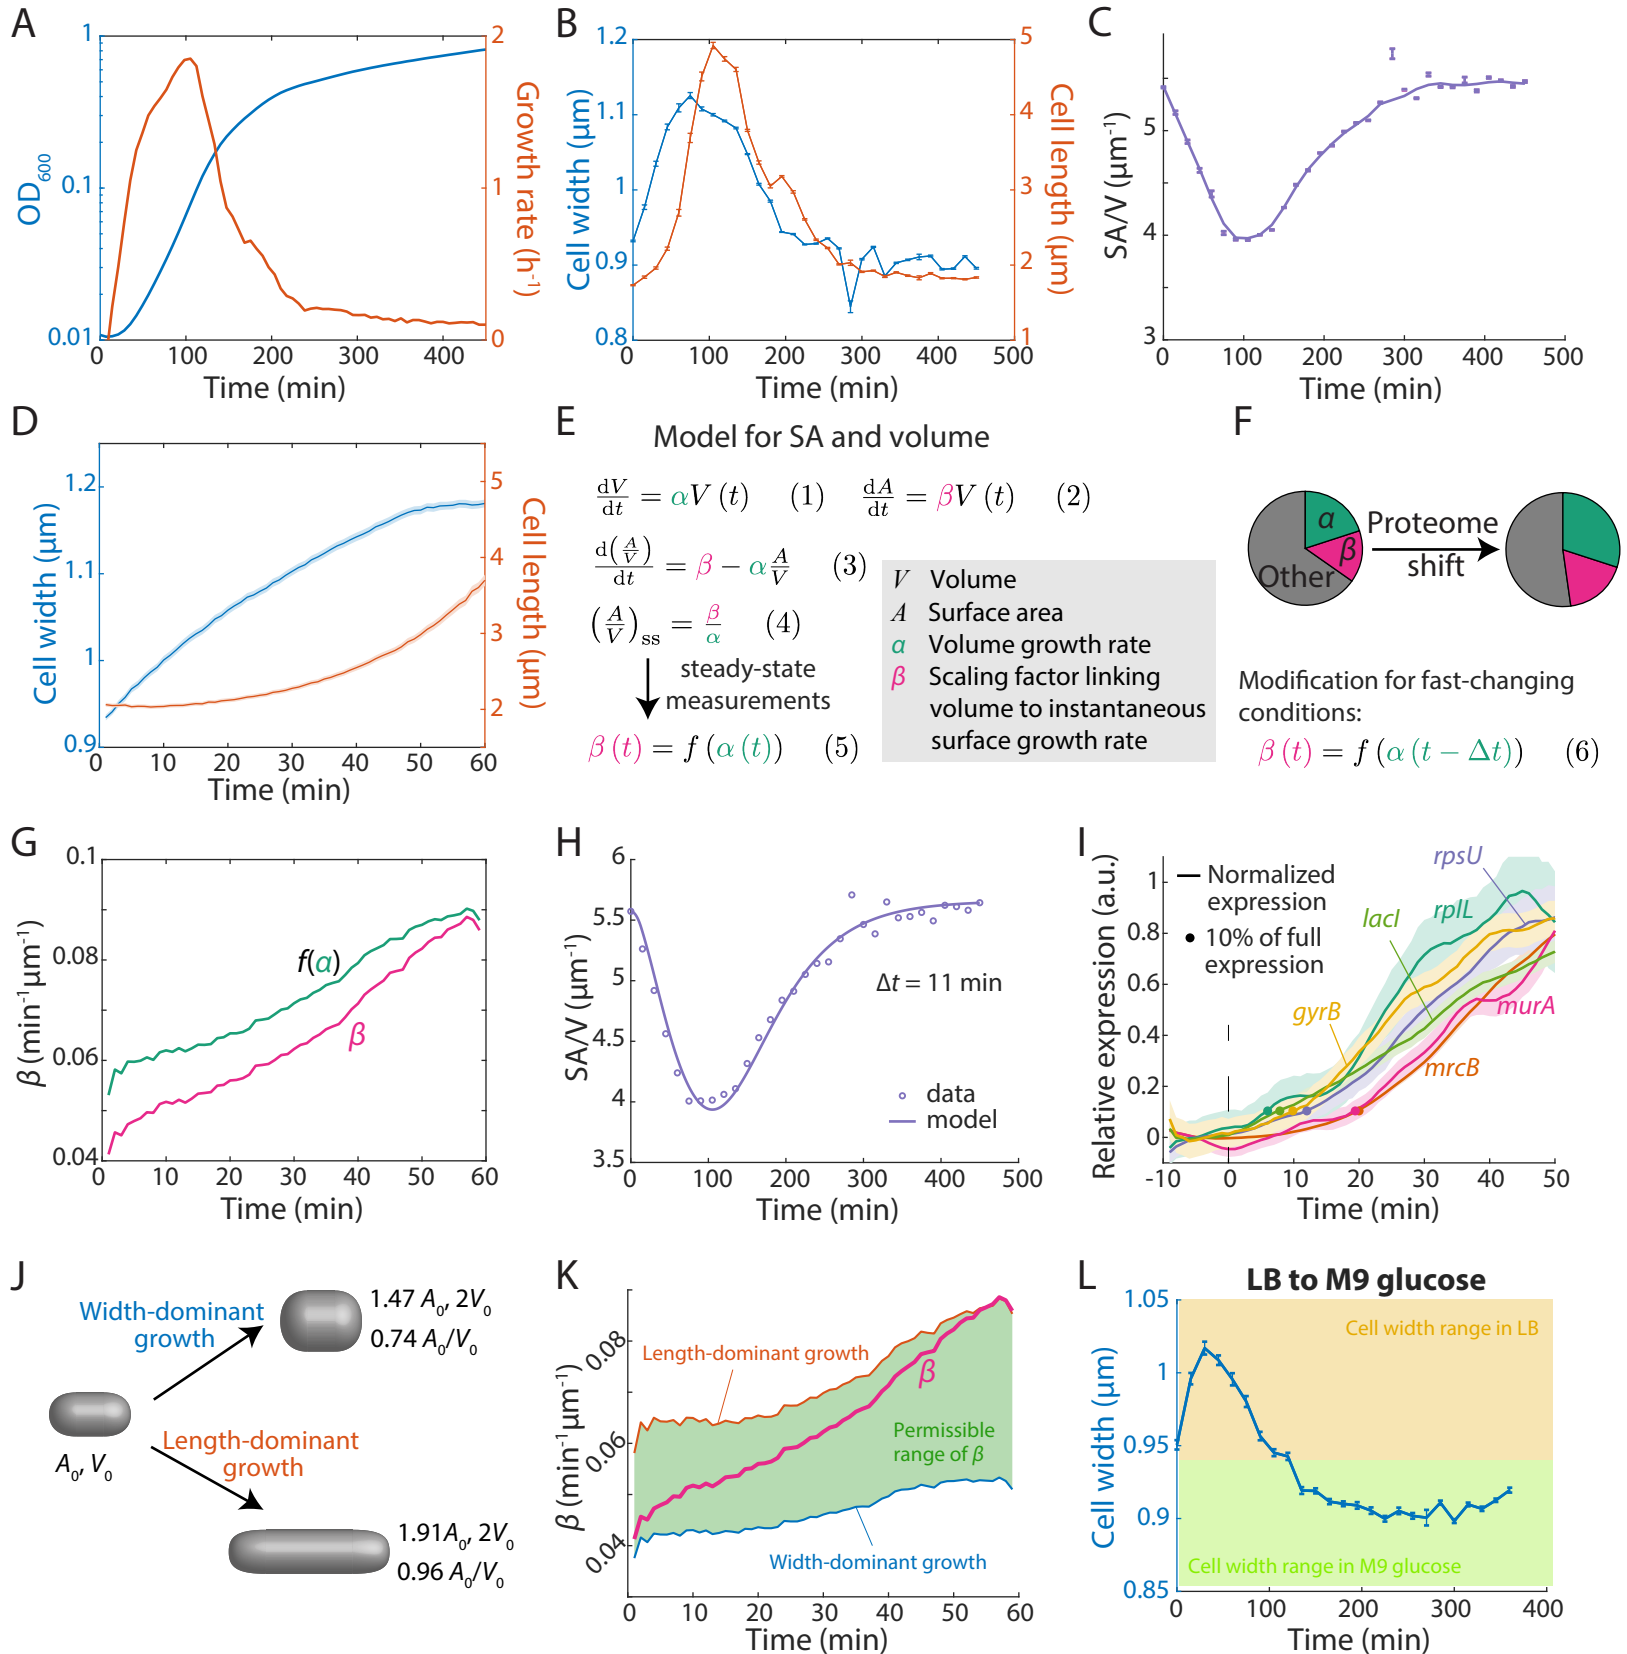

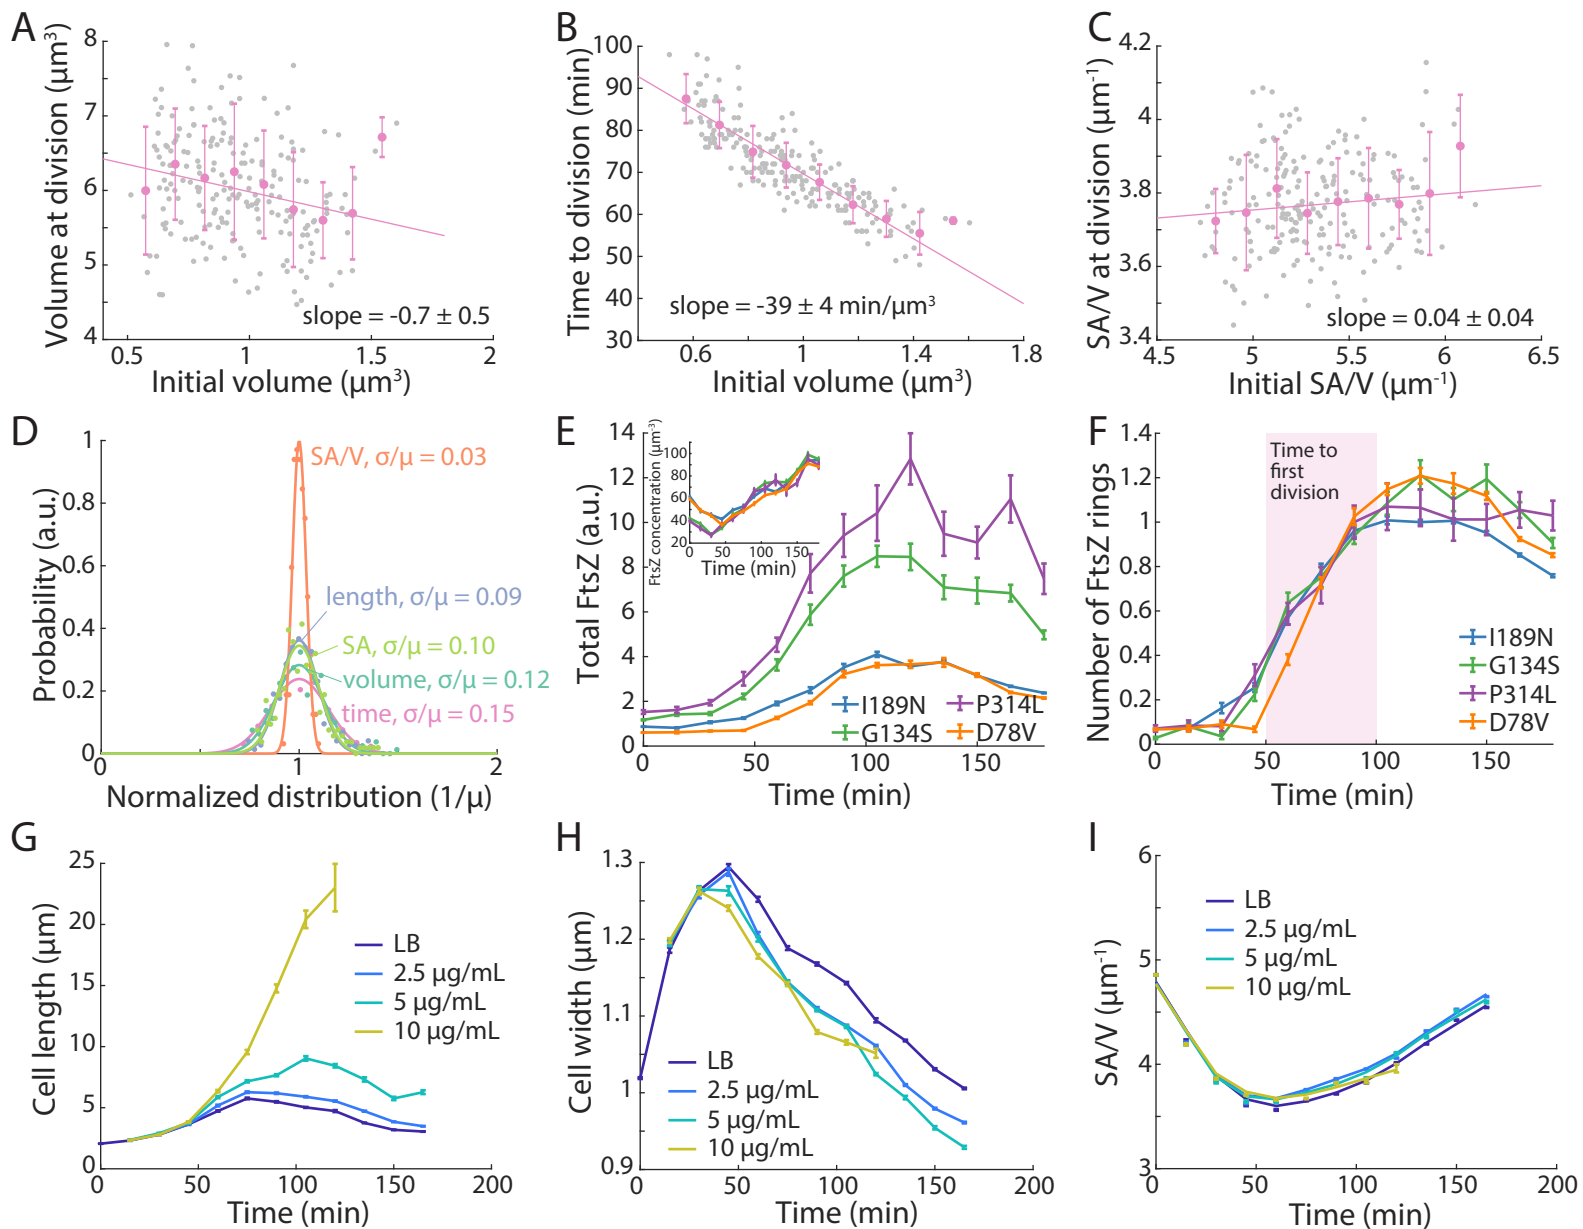



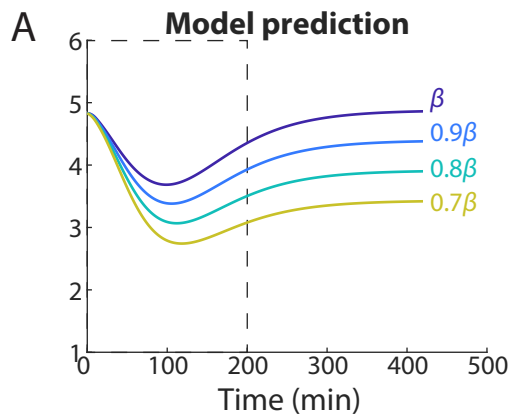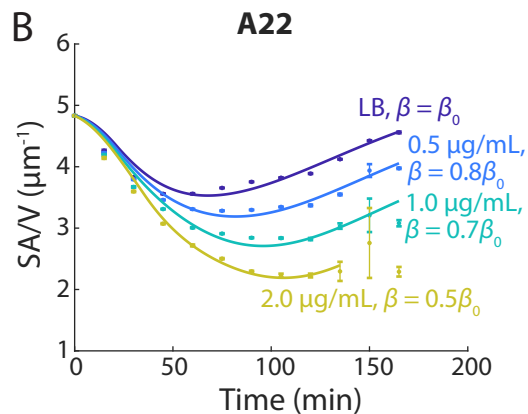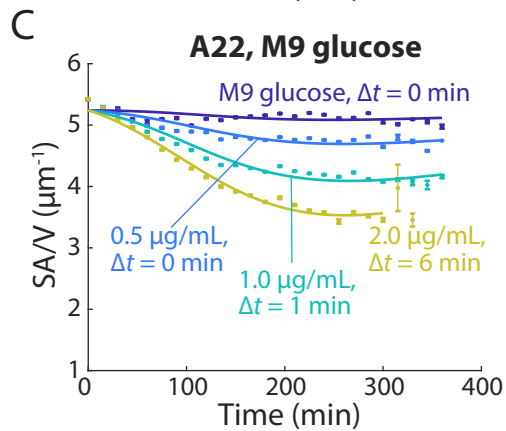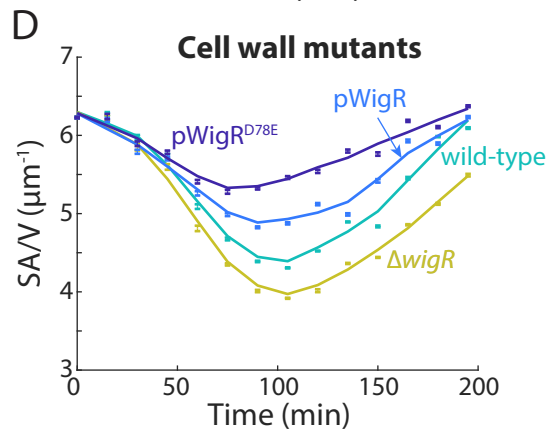

**A**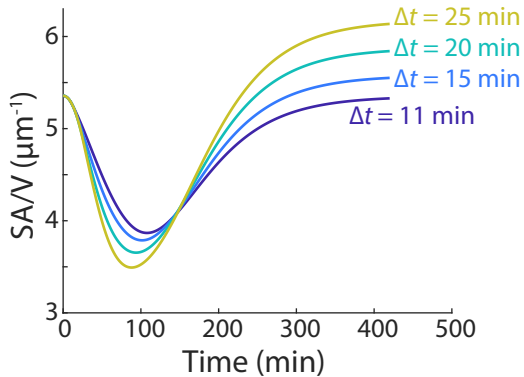**B**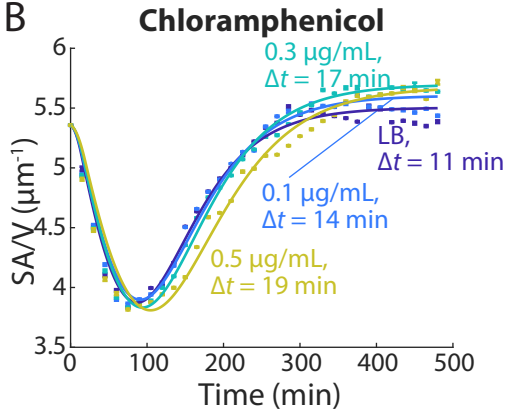

Source: http://biorxiv.org/content/10.1101/806885v1.full.pdf
